# Supplementary material
Source: publisher figshare collection journal article supplement (https://karger.figshare.com/ndownloader/files/35916185)
Supplement: Supplementary file 1 [file 35916185]

**Supplementary Figure Legends**

**Supplement Fig.1.** Associations between intraocular thickness asymmetry of total retina by each of the 32 pairs with gender, age, and axial length

**Supplement Fig.2.** Associations between intraocular thickness asymmetry of retinal nerve fiber layer by each of the 32 pairs with gender, age, and axial length

**Supplement Fig.3.** Associations between intraocular thickness asymmetry of ganglion cell layer by each of the 32 pairs with gender, age, and axial length

**Supplement Fig.4.** Associations between intraocular thickness asymmetry of inner plexiform layer by each of the 32 pairs with gender, age, and axial length
